# Supplementary material
Source: MDPI journal article supplement (https://www.mdpi.com/2311-7524/8/11/1040)
Supplement: s1 [file s1]

**Table S2.** Pearson's correlation coefficient (r) between physicochemical properties of cultivation substrate and nutritional properties of *Pleurotus ostreatus* mushroom.

| Variable                                            |                         | Nutritional properties of <i>Pleurotus ostreatus</i> mushroom |             |               |             |             |             |
|-----------------------------------------------------|-------------------------|---------------------------------------------------------------|-------------|---------------|-------------|-------------|-------------|
|                                                     |                         | Moisture content                                              | Ash content | Crude protein | Crude fiber | Crude lipid | Beta glucan |
| Physicochemical properties of cultivation substrate | Wet bulk density        | 0.783*                                                        | 0.649       | -0.275        | 0.130       | -0.585      | -0.665      |
|                                                     | Particle density        | 0.224                                                         | 0.866**     | -0.813**      | 0.103       | -0.251      | -0.733*     |
|                                                     | Porosity                | -0.768*                                                       | 0.000       | -0.517        | -0.114      | 0.492       | 0.176       |
|                                                     | pH                      | -0.152                                                        | -0.293      | 0.463         | 0.282       | 0.136       | 0.346       |
|                                                     | Moisture content        | 0.197                                                         | 0.240       | 0.082         | 0.025       | -0.165      | -0.275      |
|                                                     | Ash content             | 0.718*                                                        | 0.207       | 0.284         | -0.228      | -0.095      | -0.124      |
|                                                     | Volatile solids content | -0.718*                                                       | -0.207      | -0.284        | 0.228       | 0.095       | 0.124       |
|                                                     | Nitrogen                | 0.563                                                         | 0.259       | 0.168         | 0.036       | -0.056      | -0.166      |
|                                                     | Phosphorus              | 0.458                                                         | 0.084       | 0.467         | -0.550      | 0.082       | 0.005       |
|                                                     | Potassium               | 0.013                                                         | -0.494      | 0.706*        | -0.635      | 0.314       | 0.701*      |
|                                                     | Calcium                 | 0.264                                                         | -0.072      | 0.459         | -0.473      | 0.308       | -0.027      |
|                                                     | Magnesium               | 0.303                                                         | -0.121      | 0.568         | -0.563      | 0.254       | 0.105       |
|                                                     | Iron                    | 0.258                                                         | -0.176      | 0.276         | -0.252      | -0.230      | 0.335       |
|                                                     | Zinc                    | 0.463                                                         | 0.284       | 0.034         | -0.167      | -0.262      | 0.229       |
|                                                     | Carbon                  | -0.359                                                        | 0.306       | -0.575        | 0.070       | 0.085       | -0.016      |
|                                                     | Lignin                  | 0.020                                                         | 0.606       | -0.901**      | 0.498       | -0.263      | -0.615      |
|                                                     | Hemicellulose           | -0.166                                                        | -0.301      | 0.048         | -0.231      | -0.016      | 0.467       |
|                                                     | Cellulose               | -0.153                                                        | 0.211       | -0.292        | -0.213      | 0.490       | 0.019       |

Note:

\*\* Significantly correlated at  $p \leq 0.01$

\* Significantly correlated at  $p \leq 0.05$
