# Supplementary material
Source: MDPI journal article supplement (https://www.mdpi.com/2311-7524/8/11/1040)
Supplement: s1 [file s1]

**Table S1.** Pearson's correlation coefficient (r) between physicochemical properties of cultivation substrate and agronomic performance of *Pleurotus ostreatus* mushroom.

| Variable                                            |                         | Agronomic performance of <i>Pleurotus ostreatus</i> mushroom |                                                                    |                                           |              |                 |                                 |                                 |                                     |                       |
|-----------------------------------------------------|-------------------------|--------------------------------------------------------------|--------------------------------------------------------------------|-------------------------------------------|--------------|-----------------|---------------------------------|---------------------------------|-------------------------------------|-----------------------|
|                                                     |                         | Days taken for mycelia to fully colonize substrate           | Days taken for primordia initiation from fully colonized substrate | Days taken to complete first flush growth | Stipe length | Pileus diameter | Fresh weight of fruiting bodies | Number of total fruiting bodies | Number of effective fruiting bodies | Biological efficiency |
| Physicochemical properties of cultivation substrate | Wet bulk density        | 0.346                                                        | 0.307                                                              | 0.385                                     | 0.521        | 0.844**         | 0.286                           | -0.190                          | -0.109                              | 0.137                 |
|                                                     | Particle density        | 0.205                                                        | 0.380                                                              | 0.502                                     | 0.295        | 0.710*          | 0.649                           | -0.396                          | -0.320                              | 0.171                 |
|                                                     | Porosity                | -0.086                                                       | -0.211                                                             | -0.135                                    | -0.534       | -0.228          | 0.274                           | -0.192                          | -0.178                              | 0.089                 |
|                                                     | pH                      | -0.505                                                       | 0.096                                                              | -0.167                                    | 0.124        | -0.749*         | -0.030                          | 0.478                           | 0.264                               | -0.039                |
|                                                     | Moisture content        | 0.190                                                        | 0.293                                                              | 0.227                                     | 0.624        | 0.397           | 0.261                           | -0.234                          | -0.263                              | 0.201                 |
|                                                     | Ash content             | 0.095                                                        | 0.033                                                              | 0.062                                     | 0.247        | -0.051          | -0.098                          | 0.557                           | 0.653                               | 0.011                 |
|                                                     | Volatile solids content | -0.095                                                       | -0.033                                                             | -0.062                                    | -0.247       | 0.051           | 0.098                           | -0.557                          | -0.653                              | -0.011                |
|                                                     | Nitrogen                | -0.101                                                       | 0.218                                                              | 0.201                                     | 0.246        | -0.300          | 0.028                           | 0.593                           | 0.637                               | -0.142                |
|                                                     | Phosphorus              | 0.011                                                        | 0.072                                                              | 0.049                                     | 0.416        | -0.129          | -0.161                          | 0.455                           | 0.497                               | 0.112                 |
|                                                     | Potassium               | 0.112                                                        | -0.590                                                             | -0.580                                    | -0.208       | -0.492          | -0.369                          | 0.651                           | 0.675*                              | 0.220                 |
|                                                     | Calcium                 | -0.194                                                       | 0.214                                                              | 0.137                                     | 0.338        | -0.320          | -0.312                          | 0.322                           | 0.368                               | -0.092                |
|                                                     | Magnesium               | -0.203                                                       | 0.079                                                              | -0.012                                    | 0.308        | -0.345          | -0.341                          | 0.454                           | 0.464                               | 0.023                 |
|                                                     | Iron                    | 0.731*                                                       | -0.470                                                             | -0.157                                    | -0.211       | 0.059           | -0.216                          | 0.300                           | 0.511                               | -0.140                |
|                                                     | Zinc                    | 0.333                                                        | -0.530                                                             | -0.453                                    | -0.097       | 0.138           | 0.358                           | 0.638                           | 0.639                               | 0.555                 |
|                                                     | Carbon                  | 0.104                                                        | -0.262                                                             | -0.265                                    | -0.212       | 0.359           | 0.631                           | -0.257                          | -0.323                              | 0.569                 |
|                                                     | Lignin                  | 0.280                                                        | 0.307                                                              | 0.520                                     | -0.093       | 0.498           | 0.484                           | -0.474                          | -0.335                              | -0.240                |
|                                                     | Hemicellulose           | 0.761*                                                       | -0.641                                                             | -0.281                                    | -0.548       | 0.018           | -0.160                          | 0.087                           | 0.315                               | -0.131                |
|                                                     | Cellulose               | -0.031                                                       | -0.309                                                             | -0.429                                    | -0.131       | 0.168           | 0.507                           | 0.021                           | -0.009                              | 0.741*                |

Note:

\*\* Significantly correlated at  $p \leq 0.01$

\* Significantly correlated at  $p \leq 0.05$
